# Supplementary material for: Impact of binding to the multidrug resistance regulator protein LmrR on the photo-physics and -chemistry of photosensitizers
Source: Royal Society of Chemistry journal article supplement (doi:10.1039/d0cp01755h), 2020-01-01
Supplement: d0cp01755h1.pdf [file d0cp01755h1.pdf]

## Impact of binding to the Multidrug Resistance Regulator protein LmrR on the photo-physics and -chemistry of photosensitizers

Sara H. Mejías,<sup>\*a</sup> Gerard Roelfes,<sup>a</sup> and Wesley R. Browne<sup>\*,a</sup>

### Electronic Supporting information

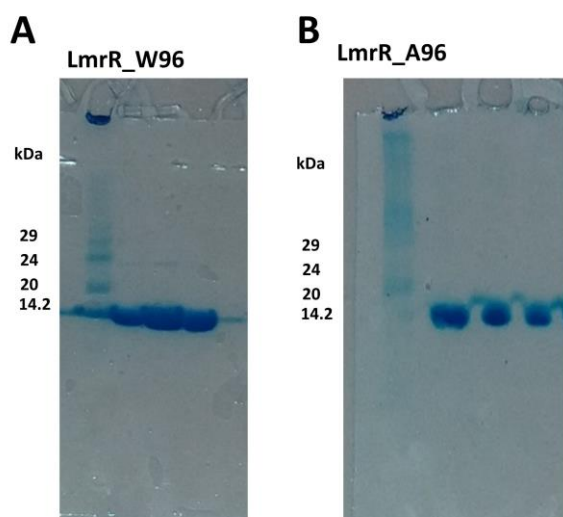

Figure S1. SDS-page gels of purified LmrR mutants. Left, LmrR\_W96, and right, LmrR\_A96.

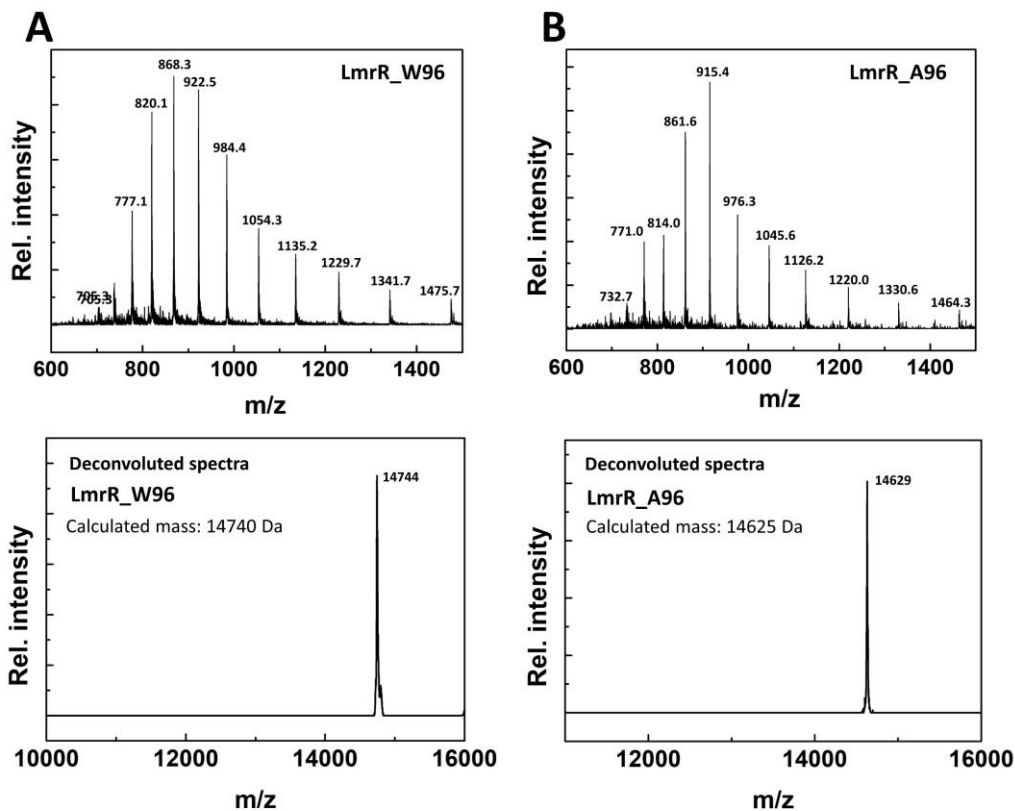

Figure S2. Electrospray ionization (ESI) mass spectra LmrR\_W96 and LmrR\_A96.

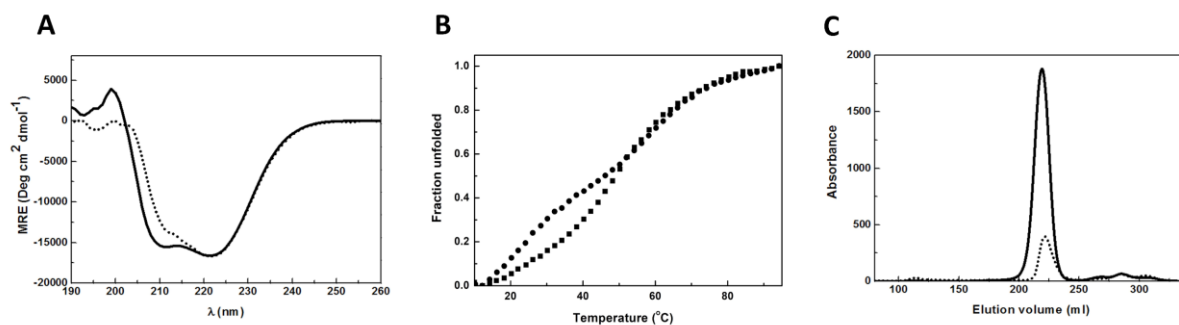

**Figure S3.** (a) Circular dichroism spectrum, (b) thermal denaturation and (c) size exclusion chromatography of LmrR\_W96 (solid lines and squares) and LmrR\_W96A (dotted lines).

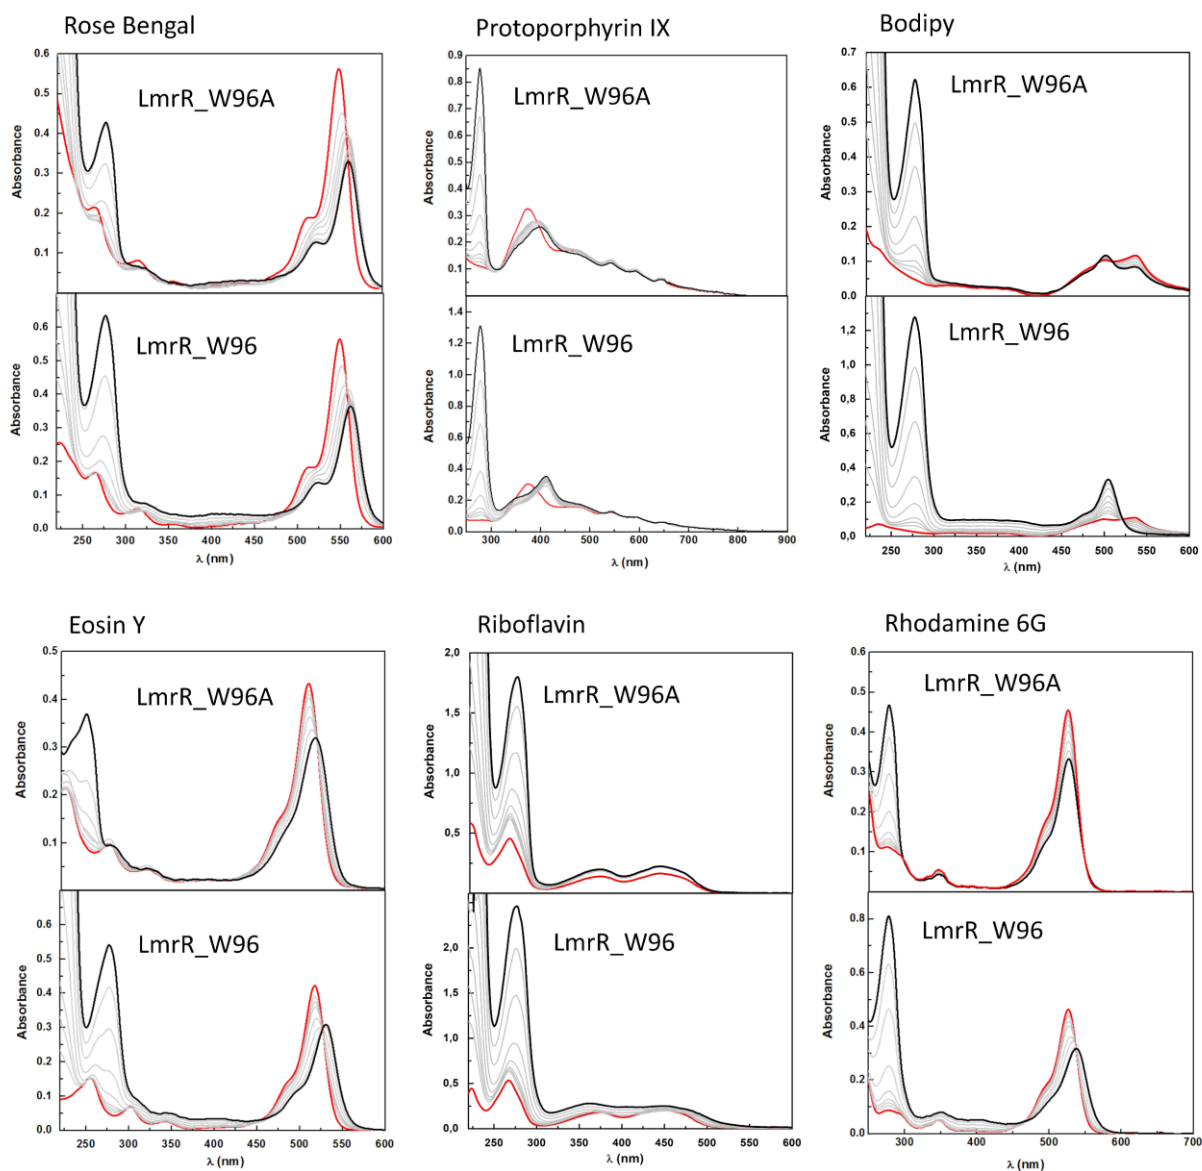

**Figure S4.** UV-vis absorbance spectra of dyes (at constant concentration) with increasing concentration from 0.1 equiv. (red line) to 10 equiv. (black line) of LmrR\_W96A or LmrR\_W96.

**A**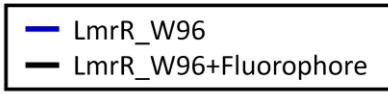**LmrR\_W96 + RB**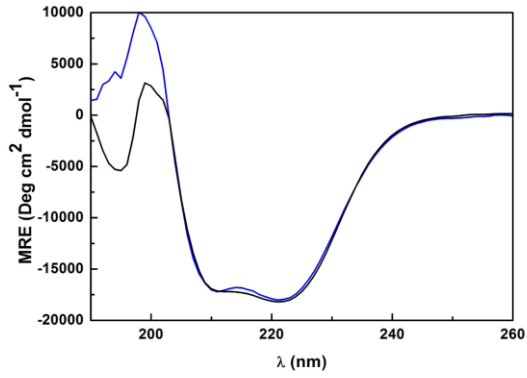**LmrR\_W96 + PpIX**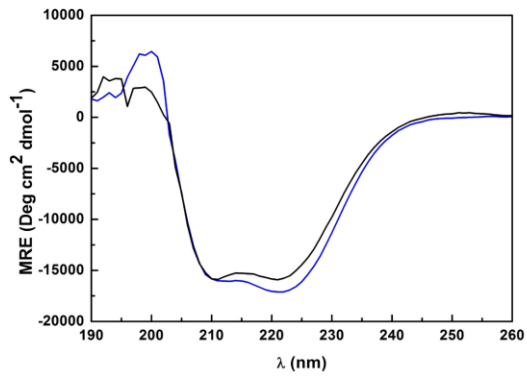**LmrR\_W96 + Bodipy**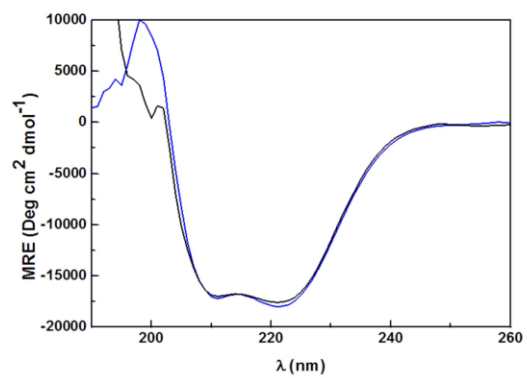**B**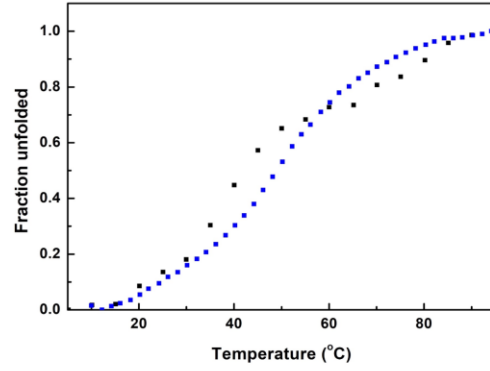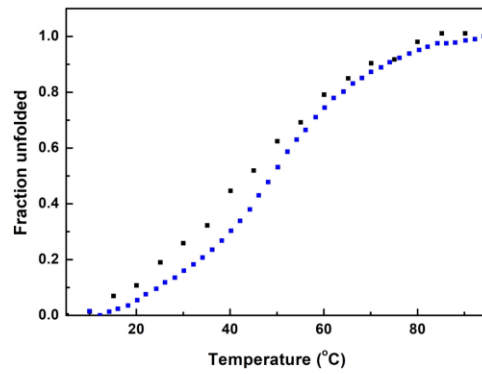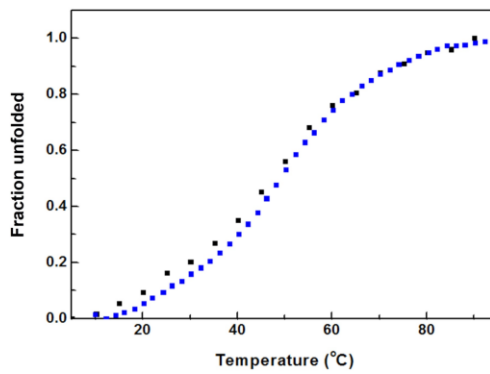

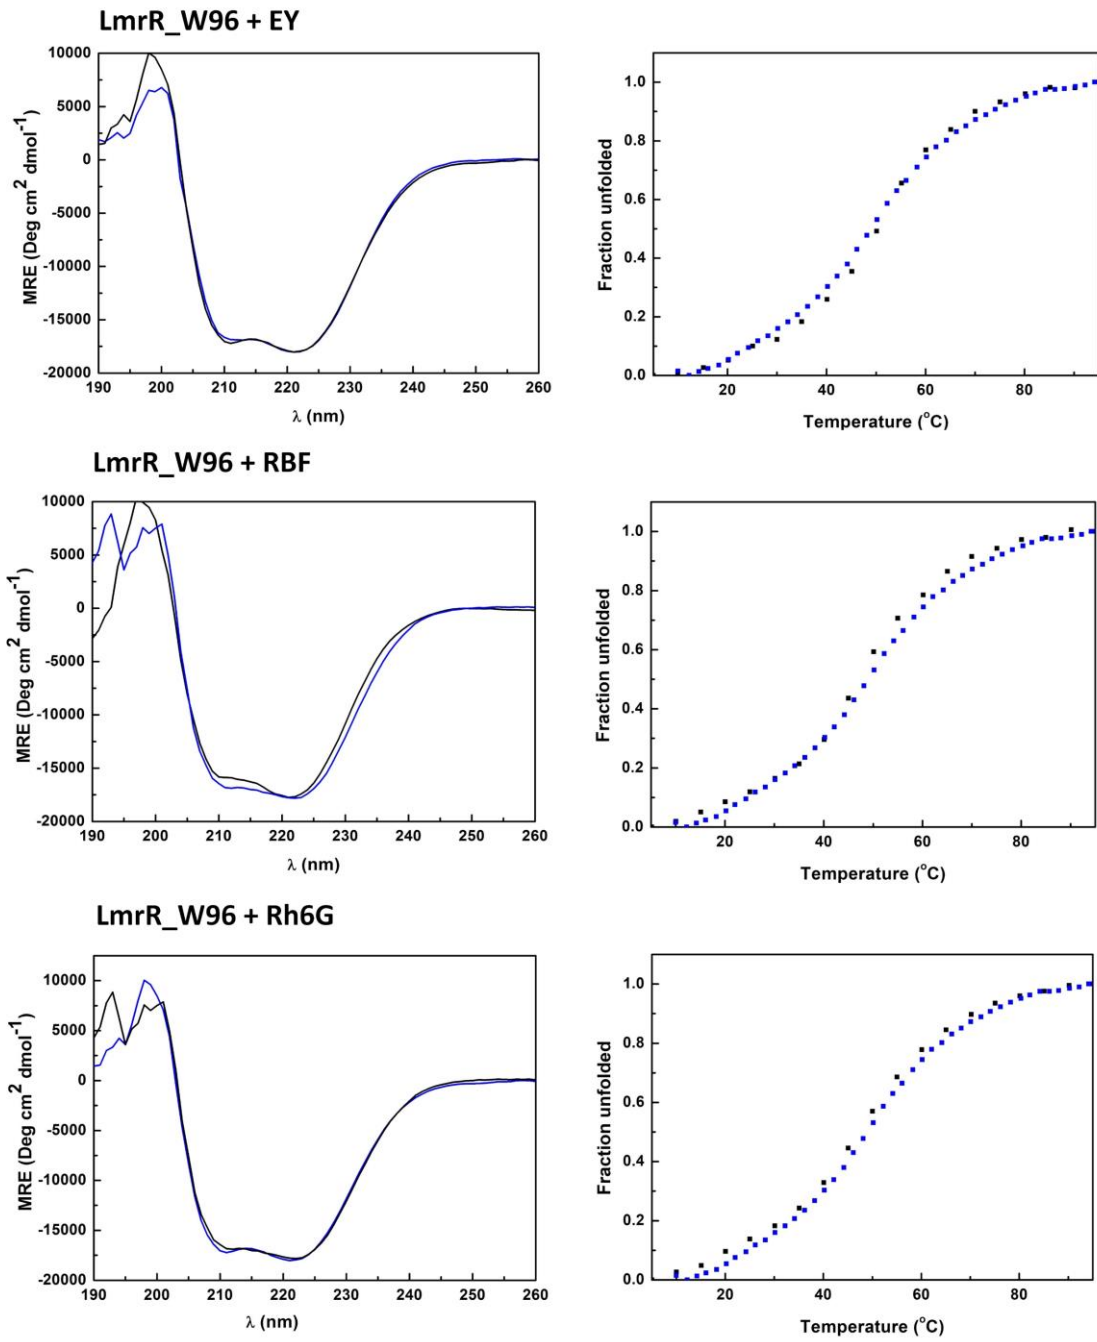

**Figure S5.** (a) Circular dichroism spectra and (b) thermal denaturation of LmrR\_W96 (blue) and LmrR\_W96 in the presence of the dyes (black).

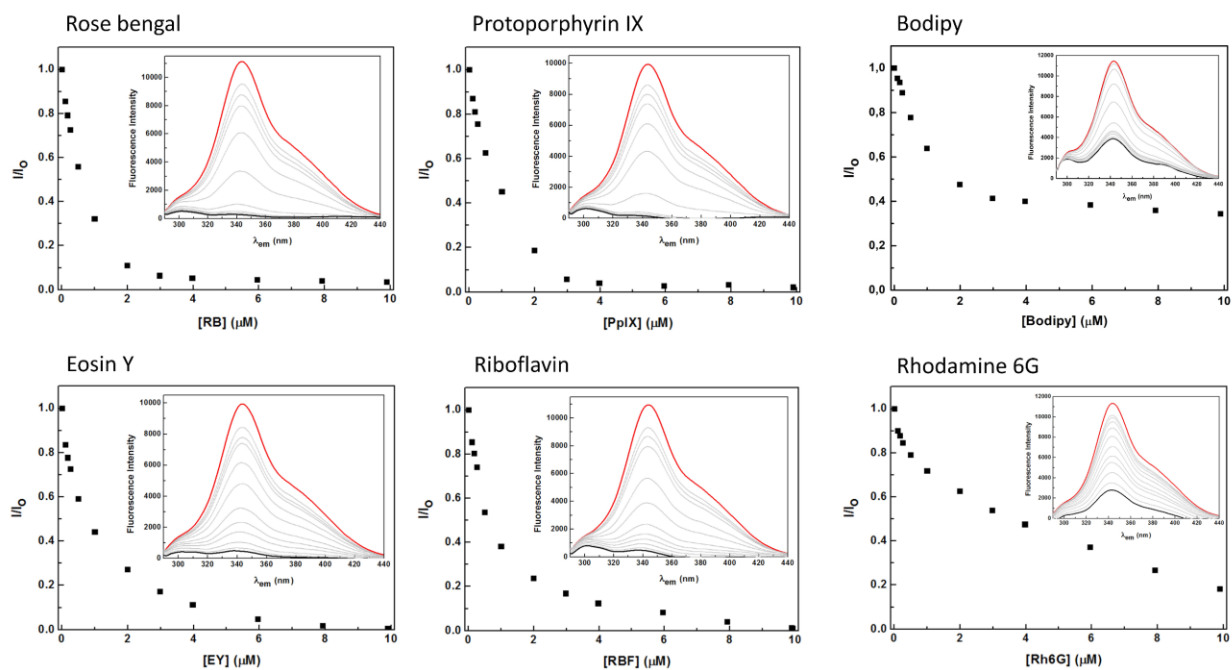

**Figure S6.** Tryptophan emission in the presence of dye ( $I$ ) divided by the intensity of tryptophan emission in the absence of the dye ( $I_0$ ). Insets, tryptophan fluorescence ( $\lambda_{\text{ex}}$  280 nm) of 1  $\mu\text{M}$  LmrR\_W96 at increasing dye concentration from 0, red line, to 10  $\mu\text{M}$ , black line.

**IRF (Instrument response function)**

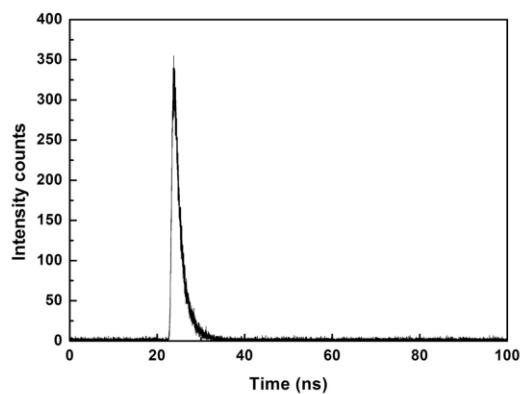

**LmrR\_W96**

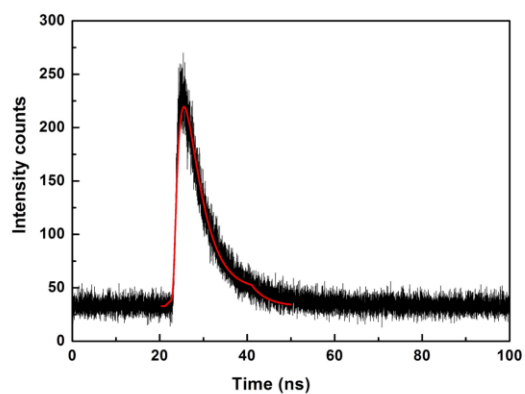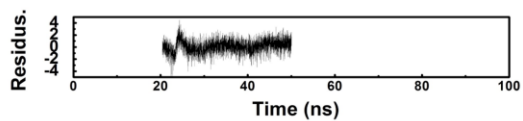

**LmrR\_W96+RB**

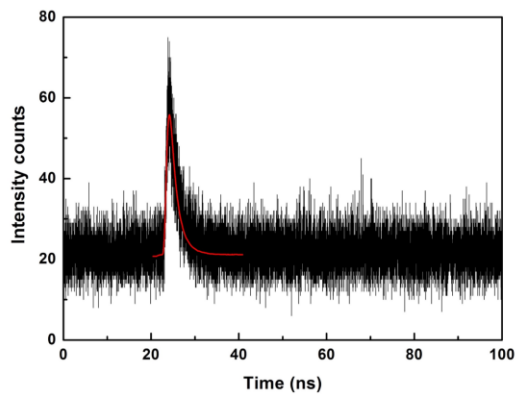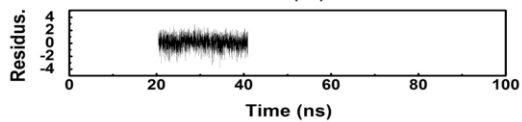

**LmrR\_W96+PpIX**

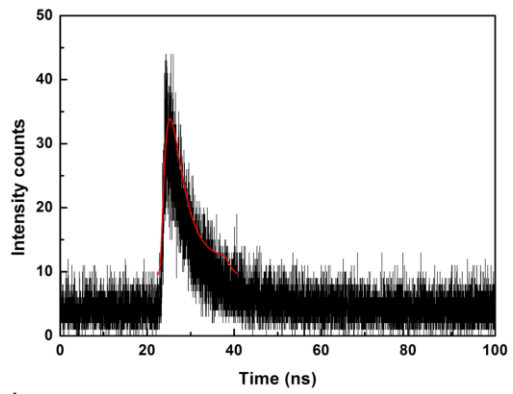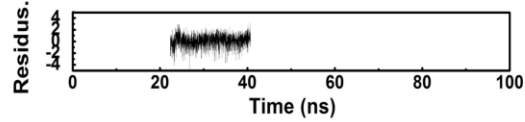

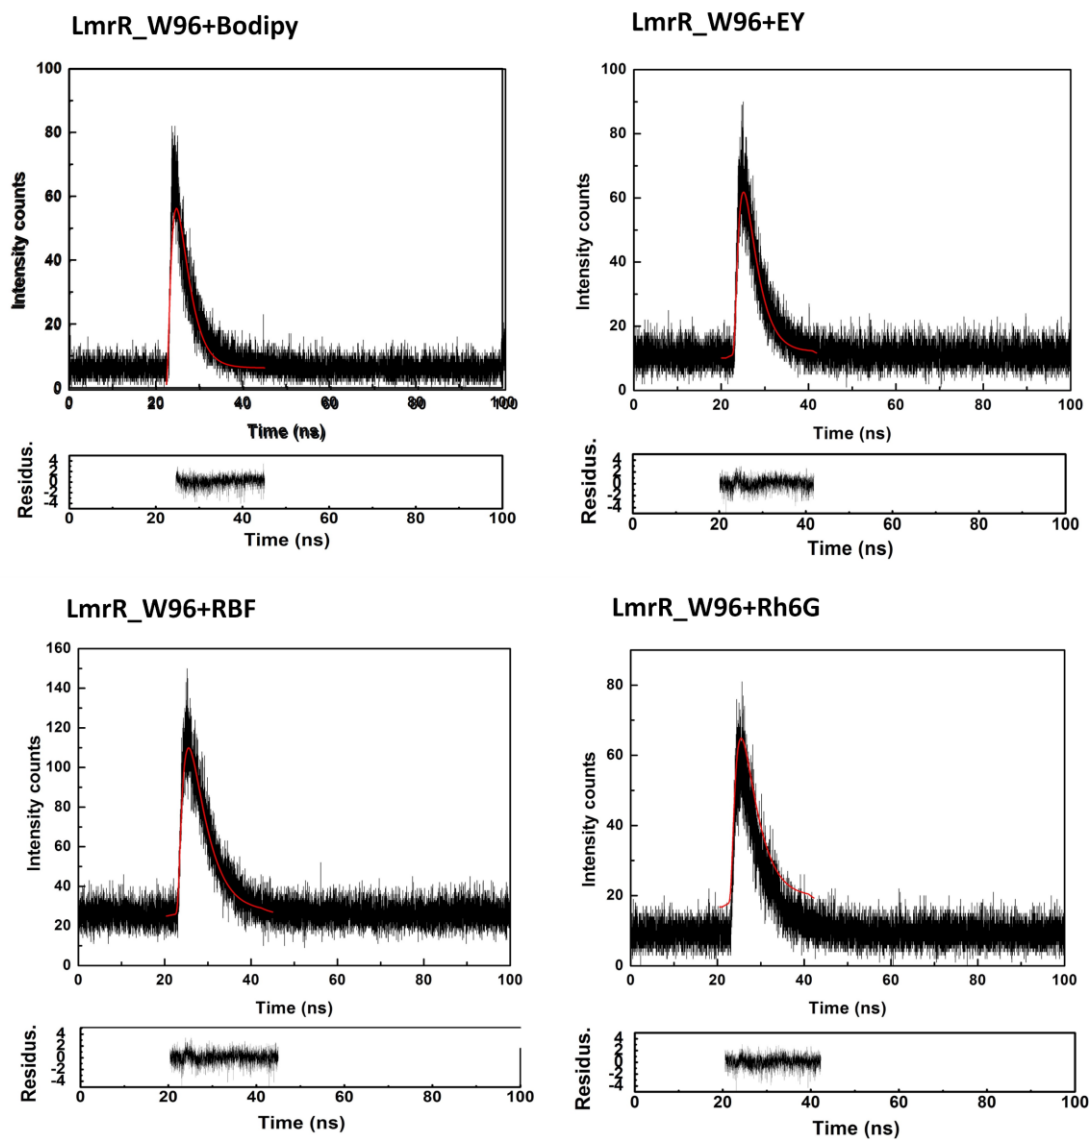

**Figure S7.** Tryptophan fluorescence lifetime decays for LmrR\_W96 and LmrR\_W96 in the presence of the dyes. Red lines indicated fit.

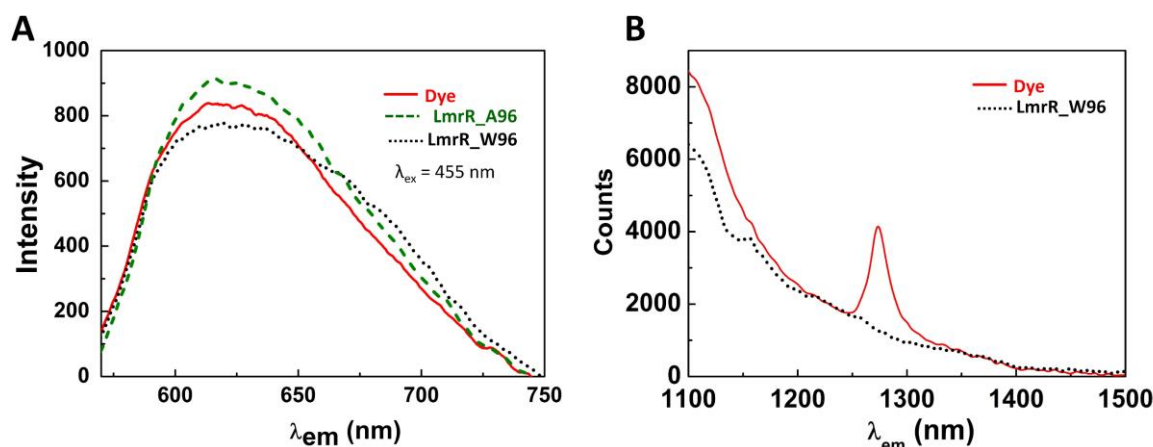

**Figure S8.** (a) Absorbance corrected  $[\text{Ru}(\text{bpy})_3]^{2+}$  emission in phosphate buffer pD 8 (red line), in the presence of LmrR\_A96 (green dashed line) and in the presence of LmrR\_W96 (black dotted line).  $\lambda_{\text{ex}} = 455$  nm. (b) NIR emission spectra showing  $^1\text{O}_2$  phosphorescence generated by excitation of  $[\text{Ru}(\text{bpy})_3]^{2+}$  ( $\lambda_{\text{ex}} = 455$  nm) in  $\text{D}_2\text{O}$  (phosphate buffer pD 8) (red line) and in the presence of LmrR\_W96 (black dotted line). The sloping background is due to emission from  $[\text{Ru}(\text{bpy})_3]^{2+}$ .

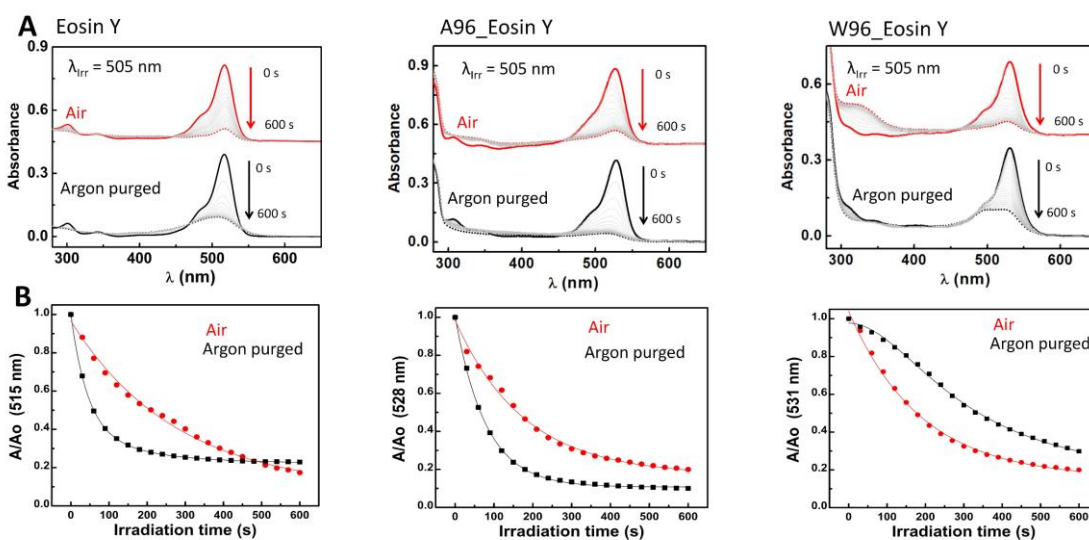

**Figure S9.** (a) Change in absorbance upon irradiation of eosin Y from 0 to 600 s in the presence (red) and absence (black) of  $\text{O}_2$  (left), in the presence of LmrR\_A96 (middle) and in the presence of LmrR\_W96 (right). The initial spectrum (solid line); final spectrum (dashed line); grey lines are spectra recorded at 30 s intervals during continuous irradiation. (b) Absorbance with respect to initial absorbance at the maximum absorbance in the visible region of Eosin Y over time in the presence (red) and absence (black) of  $\text{O}_2$ . Solid lines (black and red) are the fits using a model. Conditions:  $4 \mu\text{M}$  eosin Y in 50 mM potassium phosphate buffer pD 8 prepared in  $\text{D}_2\text{O}$ . LmrR\_A96 and LmrR\_W96 are  $16 \mu\text{M}$  (1:4 dye:protein ratio).



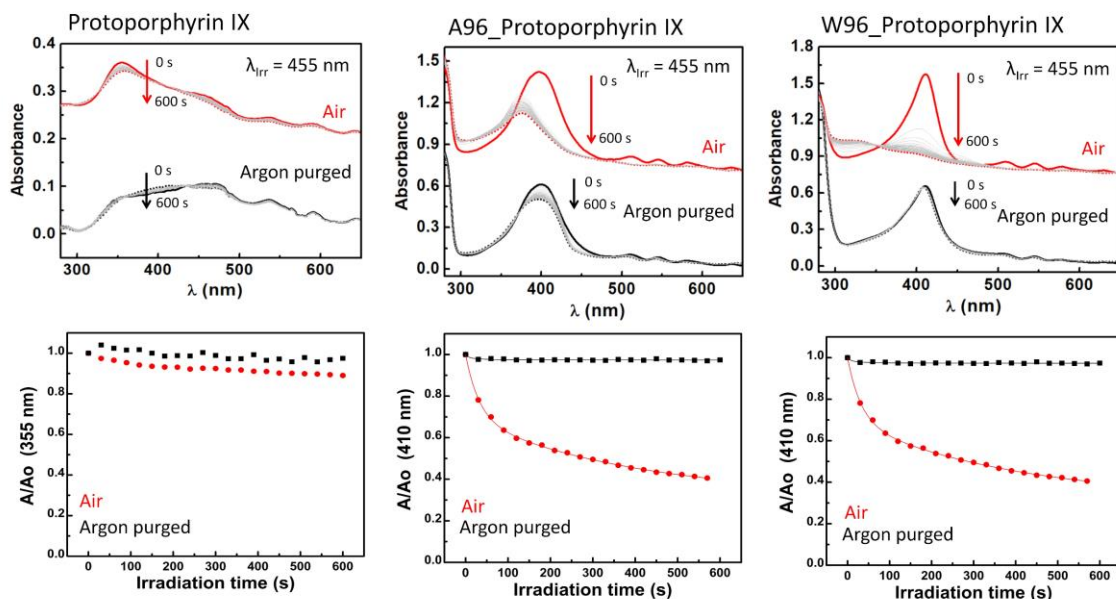

**Figure S10.** (a) Change in absorbance upon irradiation of protoporphyrin IX from 0 to 600 s in the presence (red) and absence (black) of  $O_2$  (left), in the presence of LmrR\_A96 (middle) and in the presence of LmrR\_W96 (right). The initial spectrum (solid line); final spectrum (dashed line); grey lines are spectra recorded at 30 s intervals during continuous irradiation. (b) Absorbance with respect to initial absorbance at the maximum absorbance in the visible region of protoporphyrin IX over time in the presence (red) and absence (black) of  $O_2$ . Solid lines (black and red) are the fits using a model. Conditions: 10  $\mu$ M protoporphyrin IX in 50 mM potassium phosphate buffer pD 8 prepared in  $D_2O$ . LmrR\_A96 and LmrR\_W96 are 40  $\mu$ M (1:4 dye:protein ratio).

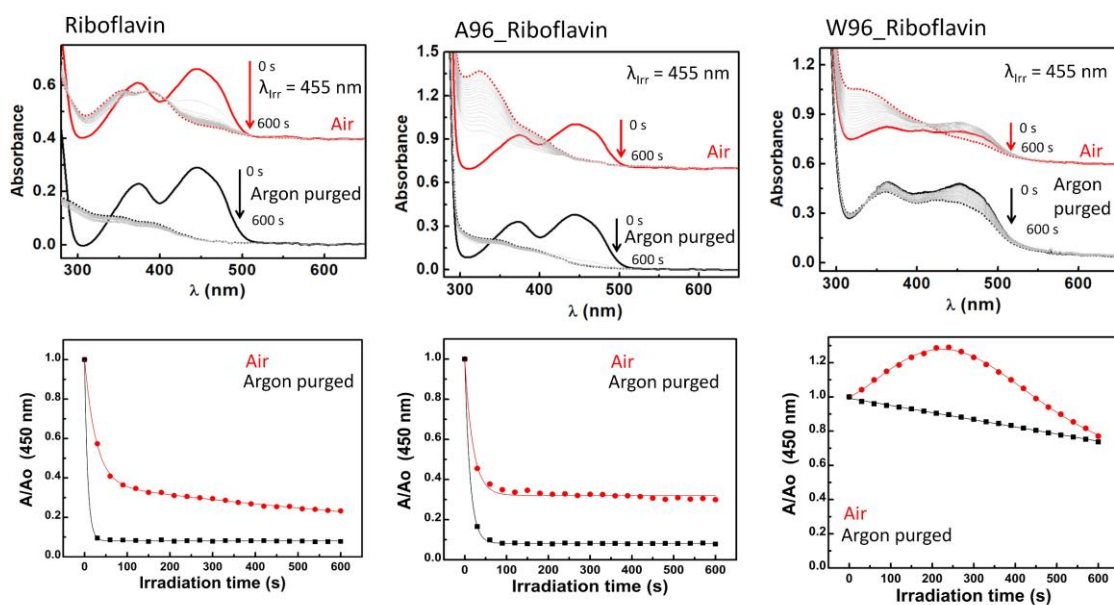

**Figure S11.** (a) Change in absorbance upon irradiation of riboflavin from 0 to 600 s in the presence (red) and absence (black) of  $O_2$  (left), in the presence of LmrR\_A96 (middle) and in the presence of LmrR\_W96 (right). The initial spectrum (solid line); final spectrum (dashed line); grey lines are spectra recorded at 30 s intervals during continuous irradiation. (b) Absorbance with respect to initial absorbance at the maximum absorbance in the visible region of riboflavin over time in the presence

(red) and absence (black) of O<sub>2</sub>. Solid lines (black and red) are the fits using a model. Conditions: 30 μM riboflavin in 50 mM potassium phosphate buffer pD 8 prepared in D<sub>2</sub>O. LmrR\_A96 and LmrR\_W96 are 120 μM (1:4 dye:protein ratio).

**Table S1.** Absorbance maximum in the visible region, fluorescence maximum and Stokes shift of the dyes in solution (red), in the presence of LmrR\_W96A (green) and in the presence of LmrR\_W96 (black).

|            | Absorbance maximum in the visible region (nm) |      |     | Fluorescence maximum (nm) |      |     | Stokes shift |      |     |
|------------|-----------------------------------------------|------|-----|---------------------------|------|-----|--------------|------|-----|
|            | water                                         | W96A | W96 | water                     | W96A | W96 | water        | W96A | W96 |
| Tryptophan | -                                             | 280  | 280 | -                         | 312  | 312 | -            | 32   | 32  |
| RB         | 549                                           | 559  | 563 | 565                       | 573  | 572 | 16           | 14   | 9   |
| PpIX       | 376                                           | 398  | 411 | 621                       | 637  | 633 | 245          | 230  | 222 |
| Bodipy     | 497                                           | 501  | 504 | 506                       | 507  | 509 | 9            | 6    | 5   |
| Eosin Y    | 515                                           | 526  | 531 | 537                       | 538  | 539 | 22           | 12   | 8   |
| RBF        | 444                                           | 444  | 454 | 526                       | 526  | 526 | 82           | 82   | 72  |
| Rh6G       | 527                                           | 527  | 537 | 551                       | 551  | 551 | 24           | 24   | 13  |

**Table S2.** Ground state and excited state reduction ( $E_{red}$ ) and oxidation ( $E_{ox}$ ) potentials of dyes.  $E_{oo}$  is the energy gap between the zeroth vibrational level of the ground and excited states in the presence of LmrR\_W96.

|                   | $E_{oo}$ (eV) | $E_{red}$ (V vs SHE) | $E_{red}^*$ (V vs SHE) | $E_{oxi}$ (V vs SHE) | $E_{oxi}^*$ (V vs SHE) |
|-------------------|---------------|----------------------|------------------------|----------------------|------------------------|
| Rose bengal       | 2.18          | -0.54                | 1.64                   | 1.33                 | -0.85                  |
| Protoporphyrin IX | 2.00          | -0.23                | 1.77                   | x                    | x                      |
| Bodipy            | 2.45          | -1.20                | 1.25                   | 1.28                 | -1.17                  |
| Eosin Y           | 2.32          | -1.06                | 1.26                   | 0.78                 | -1.54                  |
| Riboflavin        | 2.49          | -1.22                | 1.27                   | x                    | x                      |
| Rhodamine 6G      | 2.28          | -0.71                | 1.57                   | 1.63                 | -0.65                  |
| Tryptophan        |               |                      |                        | 1.09                 |                        |

**Table S3.** Fitting of changes in visible absorbance over time under continuous irradiation for rose bengal in 50 mM phosphate buffer pD 8, in the presence of LmrR\_A96 and in the presence of LmrR\_W96. Models used are indicated in the table. Protein:dye ratio 1:4.

| <b>Rose bengal</b>                |                                   |                               |
|-----------------------------------|-----------------------------------|-------------------------------|
|                                   | Air                               | Argon purged                  |
|                                   | $Y = A \cdot \exp(-Kx) + Y_0$     | $Y = A \cdot \exp(-Kx) + Y_0$ |
| K (s <sup>-1</sup> )              | $2.4 \times 10^{-3}$              | $2.6 \times 10^{-3}$          |
| A                                 | 0.8                               | 0.6                           |
| Y <sub>0</sub>                    | 0.2                               | 0.4                           |
| R-Sqr                             | 0.99                              | 0.99                          |
| <b>A96_Rose bengal</b>            |                                   |                               |
|                                   | Air                               | Argon purged                  |
|                                   | $Y = A / (1 + k_1x) - K_2x + Y_0$ | $Y = Y_0 - K_1x$              |
| K <sub>1</sub> (s <sup>-1</sup> ) | 0.9                               | $2.8 \times 10^{-4}$          |
| K <sub>2</sub> (s <sup>-1</sup> ) | $2.9 \times 10^{-4}$              | -                             |
| A                                 |                                   |                               |
| Y <sub>0</sub>                    | 0.8                               | 1                             |
| R-Sqr                             | 0.99                              | 0.99                          |
| <b>W96_Rose bengal</b>            |                                   |                               |
|                                   | Air                               | Argon purged                  |
|                                   | $Y = A / (1 + k_1x) - K_2x + Y_0$ | $Y = Y_0 - K_1x$              |
| K <sub>1</sub> (s <sup>-1</sup> ) | 0.05                              | $9.3 \times 10^{-5}$          |
| K <sub>2</sub> (s <sup>-1</sup> ) | $1.7 \times 10^{-4}$              | -                             |
| A                                 |                                   |                               |
| Y <sub>0</sub>                    | 0.5                               | 0.99                          |
| R-Sqr                             | 0.99                              | 0.99                          |

**Table S4.** Fitting of changes in visible absorbance over time under continuous irradiation for bodipy in 50 mM phosphate buffer pD 8, in the presence of LmrR\_A96 and in the presence of LmrR\_W96. Models used are indicated in the table. Protein:dye ratio 1:4.

| <b>Bodipy</b>        |                               |
|----------------------|-------------------------------|
| Air                  |                               |
|                      | $Y = A \cdot \exp(-Kx) + Y_0$ |
| K (s <sup>-1</sup> ) | $2.7 \times 10^{-3}$          |
| A                    | 1                             |
| Y <sub>0</sub>       | 0                             |
| R-Sqr                | 0.99                          |
| <b>A96_Bodipy</b>    |                               |
| Air                  |                               |
|                      | $Y = A \cdot \exp(-Kx) + Y_0$ |
| K (s <sup>-1</sup> ) | $2.7 \times 10^{-3}$          |
| A                    | 1                             |
| Y <sub>0</sub>       | 0                             |
| R-Sqr                | 0.99                          |

**Table S5.** Protein:dye ratio 1:4. Fitting of changes in visible absorbance over time under continuous irradiation for Eosin Y in 50 mM phosphate buffer pD 8, in the presence of LmrR\_A96 and in the presence of LmrR\_W96. Models used are indicated in the table. Protein:dye ratio 1:4.

| <b>Eosin Y</b>       |                               |                                  |
|----------------------|-------------------------------|----------------------------------|
|                      | Air                           | Argon purged                     |
|                      | $Y = A \cdot \exp(-Kx) + Y_0$ | $Y = A \cdot \exp(-Kx) + Y_0$    |
| K (s <sup>-1</sup> ) | 3.6x10 <sup>-3</sup>          | 1.6x10 <sup>-2</sup>             |
| A                    | 0.9                           | 0.8                              |
| Y <sub>0</sub>       | 0.08                          | 0.24                             |
| R-Sqr                | 0.99                          | 0.99                             |
| <b>A96_Eosin Y</b>   |                               |                                  |
|                      | Air                           | Argon purged                     |
|                      | $Y = A \cdot \exp(-Kx) + Y_0$ | $Y = A \cdot \exp(-Kx) + Y_0$    |
| K (s <sup>-1</sup> ) | 5.6x10 <sup>-3</sup>          | 1.1x10 <sup>-2</sup>             |
| A                    | 0.8                           | 0.9                              |
| Y <sub>0</sub>       | 0.2                           | 0.1                              |
| R-Sqr                | 0.99                          | 0.99                             |
| <b>W96_Eosin Y</b>   |                               |                                  |
|                      | Air                           | Argon purged                     |
|                      | $Y = A \cdot \exp(-Kx) + Y_0$ | $Y = A / (1 + (Kx)^\beta) + Y_0$ |
| K (s <sup>-1</sup> ) | 5.3x10 <sup>-3</sup>          | 3.3x10 <sup>-3</sup>             |
| A                    | 0.9                           | 0.9                              |
| Y <sub>0</sub>       | 0.2                           | 0.1                              |
| R-Sqr                | 0.99                          | 0.99                             |

**Table S6.** Fitting of changes in visible absorbance over time under continuous irradiation for protoporphyrin IX in 50 mM phosphate buffer pD 8, in the presence of LmrR\_A96 and in the presence of LmrR\_W96. Models used are indicated in the table. Protein:dye ratio 1:4.

| <b>A96_Protoporphyrin IX</b>      |                                                           |
|-----------------------------------|-----------------------------------------------------------|
| Air                               |                                                           |
|                                   | $Y = A \cdot \exp(-Kx) + Y_0$                             |
| K (s <sup>-1</sup> )              | 1.8x10 <sup>-3</sup>                                      |
| A                                 | 0.5                                                       |
| Y <sub>0</sub>                    | 0.5                                                       |
| R-Sqr                             | 0.99                                                      |
| <b>W96_protoporphyrin IX</b>      |                                                           |
| Air                               |                                                           |
|                                   | $Y = A_1 \cdot \exp(-K_1x) + A_2 \cdot \exp(-K_2x) + Y_0$ |
| K <sub>1</sub> (s <sup>-1</sup> ) | 5.8 x10 <sup>-2</sup>                                     |
| K <sub>2</sub> (s <sup>-1</sup> ) | 4.1x10 <sup>-3</sup>                                      |
| A <sub>1</sub>                    | 0.6                                                       |
| A <sub>2</sub>                    | 0.2                                                       |
| Y <sub>0</sub>                    | 0.2                                                       |
| R-Sqr                             | 0.99                                                      |

**Table S7.** Protein:dye ratio 1:4. Fitting of changes in visible absorbance over time under continuous irradiation for riboflavin in 50 mM phosphate buffer pD 8, in the presence of LmrR\_A96 and in the presence of LmrR\_W96. Models used are indicated in the table. Protein:dye ratio 1:4.

| <b>Riboflavin</b>        |                                                           |                               |
|--------------------------|-----------------------------------------------------------|-------------------------------|
|                          | Air                                                       | Argon purged                  |
|                          | $Y = A_1 \cdot \exp(-K_1x) + A_2 \cdot \exp(-K_2x) + Y_0$ | $Y = A \cdot \exp(-Kx) + Y_0$ |
| $K_1$ (s <sup>-1</sup> ) | $3.7 \times 10^{-2}$                                      | $1.4 \times 10^{-1}$          |
| $K_2$ (s <sup>-1</sup> ) | $8.1 \times 10^{-4}$                                      | X                             |
| A <sub>1</sub>           | 0.6                                                       | 0.9                           |
| A <sub>2</sub>           | 0.4                                                       | X                             |
| Y <sub>0</sub>           | 0                                                         | 0.1                           |
| R-Sqr                    | 0.99                                                      | 0.99                          |
| <b>A96_Riboflavin</b>    |                                                           |                               |
|                          | Air                                                       | Argon purged                  |
|                          | $Y = A \cdot \exp(-Kx) + Y_0$                             | $Y = A \cdot \exp(-Kx) + Y_0$ |
| K (s <sup>-1</sup> )     | $5.1 \times 10^{-2}$                                      | $7.9 \times 10^{-2}$          |
| A                        | 0.9                                                       | 0.7                           |
| Y <sub>0</sub>           | 0.1                                                       | 0.3                           |
| R-Sqr                    | 0.99                                                      | 0.99                          |

**Emission lifetime decay data.**

**Table S8.** Fluorescence decay lifetime of tryptophan in the presence of quencher.

| <i>Protein</i>                                     | <i>Lifetime (ns)</i> |
|----------------------------------------------------|----------------------|
| <i>LmrR_W96</i>                                    | 3.5                  |
| <i>LmrR_W96+PpIX</i>                               | 2.4                  |
| <i>LmrR_W96+RB</i>                                 | cross-correlated     |
| <i>LmrR_W96+EY</i>                                 | 2.4                  |
| <i>LmrR_W96+Rh6G</i>                               | 3.3                  |
| <i>LmrR_W96+RBF</i>                                | 3.7                  |
| <i>LmrR_W96+Bodipy</i>                             | 2.9                  |
| <i>LmrR_W96+[Ru(bpy)<sub>3</sub>]<sup>2+</sup></i> | 3.1                  |

**Table S9.** Fluorescence decay lifetime of dyes in solution and in the presence of LmrR\_W96.

|                          | Fluorescence lifetime (ns) |
|--------------------------|----------------------------|
| <b>Protoporphyrin IX</b> |                            |
| Water                    | cross-correlated           |
| LmrR_W96                 | 8.2                        |
| Methanol                 | 14.2                       |
| DMSO                     | 22.9                       |
| <b>Rose Bengal</b>       |                            |

|                     |                  |
|---------------------|------------------|
| Water               | cross-correlated |
| LmrR_W96            | cross-correlated |
| <i>Methanol*</i>    | 0.55             |
| Acetonitrile        | 2.3              |
| <b>Eosin Y</b>      |                  |
| Water               | 1.12             |
| LmrR_W96            | 1.8              |
| Ethanol             | 3.3              |
| DMSO                | 3.8              |
| <b>Rhodamine 6G</b> |                  |
| water               | 4.1              |
| LmrR_W96            | 3.8              |
| DMSO                | 3.8              |
| <b>Riboflavin</b>   |                  |
| Water               | 4.5              |
| LmrR_W96            | 4.5              |
| Acetonitrile        | 4.7              |
| <b>Bodipy</b>       |                  |
| Water               | 1.7              |
| LmrR_W96            | 4.7              |
| Methanol            | 3.7              |

\*D. Huppert, S. D. Rand, A.H. Reynolds and P.M. Rentzepis, *J. Chem. Phys.* **1982**, 77, 1214-1224
